# Supplementary material for: Barriers and Facilitators Perceived by Spanish Experts Concerning Nursing Research: A Delphi Study
Source: Int J Environ Res Public Health. 2020 May 6;17(9):3224. doi: 10.3390/ijerph17093224 (PMC7246773; doi:10.3390/ijerph17093224)
Supplement: Supplementary file 1 [file ijerph-17-03224-s001.pdf]

**Supplementary Table S1.** Rest of the statements after round two (Low and medium-consensus statements).

| <b>Strengths</b>                                                                                                            | <b>Mean (<math>\pm</math> SD)</b> | <b>% of Agreement</b> |
|-----------------------------------------------------------------------------------------------------------------------------|-----------------------------------|-----------------------|
| <i><b>Nursing environment</b></i>                                                                                           |                                   |                       |
| Positive attitude towards nursing care                                                                                      | 8.61 (1.15)                       | 61.1                  |
| Being always close to patients                                                                                              | 8.33 (1.50)                       | 44.4                  |
| Nursing possess the leadership in health education                                                                          | 8.11 (1.57)                       | 44.4                  |
| Autonomy at work                                                                                                            | 7.56 (1.79)                       | 27.8                  |
| The eminently practical character of our profession                                                                         | 7.44 (1.79)                       | 22.2                  |
| The rapid applicability of nursing research                                                                                 | 7.28 (1.84)                       | 22.2                  |
| <i><b>Academic level achieved</b></i>                                                                                       |                                   |                       |
| Development of nursing specialties, which facilitates training associated with research and evidence-based nursing practice | 8.06 (1.35)                       | 50.0                  |
| The emergence of Advance Practice Nursing                                                                                   | 7.67 (1.88)                       | 44.4                  |
| The existence of master and PhD programs                                                                                    | 7.89 (1.88)                       | 38.9                  |
| Wide range of postgraduate studies                                                                                          | 7.83 (1.30)                       | 38.9                  |
| <i><b>Support for research from Health Administration</b></i>                                                               |                                   |                       |
| Easy connection via internet with other professionals with the same research interests                                      | 7.72 (1.93)                       | 33.3                  |
| <b>Opportunities</b>                                                                                                        |                                   |                       |
| <i><b>Nursing environment</b></i>                                                                                           |                                   |                       |
| Possibility of being part of multicentric and multidisciplinary research networks                                           | 8.72 (1.32)                       | 61.1                  |
| Create research groups linked to nursing                                                                                    | 8.00 (2.22)                       | 55.6                  |
| Nursing has access to population groups potentially included in the health care research field                              | 8.61 (0.85)                       | 50.0                  |
| To work in an interdisciplinary team                                                                                        | 8.00 (1.90)                       | 44.4                  |
| Most of the nursing care areas has not been evaluated yet, so it is an innovative field of action                           | 7.39 (1.50)                       | 33.3                  |
| Become aware that nursing discipline has its own field of knowledge and is not subordinate to other health sciences         | 7.33 (2.47)                       | 27.8                  |
| <i><b>Academic level achieved</b></i>                                                                                       |                                   |                       |
| To speak foreign languages. especially English language                                                                     | 8.44 (1.46)                       | 55.6                  |
| <i><b>Health administration</b></i>                                                                                         |                                   |                       |
| Financial support for specific training                                                                                     | 7.94 (2.75)                       | 66.7                  |
| Financial support to attend research events                                                                                 | 7.89 (2.74)                       | 61.1                  |
| To achieve free days or reduction of hours within the working day for research tasks                                        | 7.67 (2.52)                       | 38.9                  |
| <i><b>Support for research from Health Administration</b></i>                                                               |                                   |                       |
| Positive discrimination measures when applying for funding for research projects                                            | 7.56 (2.71)                       | 44.4                  |

---

**Weaknesses*****Nursing environment***

|                                                                                                     |             |      |
|-----------------------------------------------------------------------------------------------------|-------------|------|
| Invisibility of research results                                                                    | 8.17 (2.01) | 55.6 |
| Difficulty to publish in JCR journals                                                               | 7.83 (2.77) | 55.6 |
| There is a historical weakness of nursing as a science                                              | 7.78 (2.32) | 55.6 |
| There is no union between research groups and/or research units                                     | 7.89 (1.90) | 50.0 |
| Few renowned national research groups                                                               | 7.83 (2.01) | 50.0 |
| “Research in nursing care” is usually confused with “evidence-based nursing practice”               | 6.83 (2.90) | 44.4 |
| Difficulties to publish research results in languages other than Spanish                            | 7.72 (2.52) | 33.3 |
| There were no lines of research in nursing until recently                                           | 7.11 (2.22) | 33.3 |
| The scientific quality criteria do not take into account emerging areas in research such as nursing | 7.33 (2.20) | 27.8 |
| Nursing research groups have been created very late in Spain                                        | 7.06 (2.18) | 22.2 |

***Support for research from Health Administration***

|                                                                                                     |             |      |
|-----------------------------------------------------------------------------------------------------|-------------|------|
| Lack of funding for research projects and for personnel to carry them out                           | 8.33 (1.53) | 55.6 |
| It is difficult to apply for funding because nursing applicant’s resumes are not competitive enough | 7.72 (2.19) | 44.4 |

***Academic background***

|                                                                |             |      |
|----------------------------------------------------------------|-------------|------|
| Lack of undergraduate or graduate research training            | 7.67 (2.03) | 44.4 |
| Little ability to read studies in languages other than Spanish | 7.61 (1.94) | 33.3 |

***Nursing profession***

|                                                                                                          |             |      |
|----------------------------------------------------------------------------------------------------------|-------------|------|
| Most nurses are women (feminization of the profession) and base of gender inequality                     | 8.17 (1.38) | 50.0 |
| To conceive nursing as a teaching-assistance process without considering research as a part of their own | 7.78 (1.99) | 50.0 |
| Little corporatism among nursing professionals                                                           | 7.72 (2.19) | 50.0 |
| Interest in anything: lack of involvement, dedication, sacrifice and responsibility                      | 7.61 (2.17) | 44.4 |
| Nursing invisibility                                                                                     | 7.17 (2.18) | 27.8 |
| Phobia of theoretical studies                                                                            | 7.22 (1.87) | 22.2 |

---

**Threats*****Nursing environment***

|                                             |             |      |
|---------------------------------------------|-------------|------|
| Fear of sharing ideas, projects and results | 6.33 (2.35) | 16.7 |
|---------------------------------------------|-------------|------|

***Health administration***

|                                                                                      |             |      |
|--------------------------------------------------------------------------------------|-------------|------|
| Lack of recognition of nursing by hospital management and health administration      | 8.61 (2.57) | 77.8 |
| There is a lack of flexibility at work to devote part of the working day to research | 8.39 (2.20) | 66.7 |
| Work shifts and care load                                                            | 8.22 (2.07) | 61.1 |
| Registered nurses do not want to work outside the workday to develop research        | 7.56 (2.06) | 38.9 |

*PhD issues*

|                                                                                                                                                                           |             |      |
|---------------------------------------------------------------------------------------------------------------------------------------------------------------------------|-------------|------|
| Shortage of Doctors in Nursing with the ministry authorization to direct a doctoral thesis in nursing                                                                     | 8.22 (2.49) | 61.1 |
| Shortage of Doctors in Nursing who can achieve a lecturer/professor position at the Master level                                                                          | 7.22 (2.79) | 44.4 |
| There are hardly any Doctors in Nursing to lead other nursing doctoral students                                                                                           | 7.89 (1.91) | 38.9 |
| Having performed PhD in other disciplines has resulted in that many nurses have stayed in non-nursing research groups and the research results go along those other lines | 7.28 (2.24) | 38.9 |
| Prior to the implementation of the EHEA, not being able to do PhD programs in nursing (PhD were performed in other disciplines)                                           | 6.72 (3.01) | 38.9 |

*Academic background*

|                                                                                                                                            |             |      |
|--------------------------------------------------------------------------------------------------------------------------------------------|-------------|------|
| Lectures in research methodology at the undergraduate university level are scarce                                                          | 7.61 (2.12) | 44.4 |
| Critical thinking deficit in the nursing professional group                                                                                | 7.78 (1.70) | 33.3 |
| Studies of weak scientific rigor are being carried out, leading to the false belief that nurses are able to investigate Nursing profession | 6.39 (2.43) | 22.2 |
| Lack of knowledge of the usefulness of research among nursing professionals                                                                | 8.11 (1.57) | 55.6 |
| The existence of a glass ceiling for nursing discipline                                                                                    | 8.11 (1.78) | 44.4 |
| It is not recognized that nursing can investigate; nursing is considered a trade, not a science                                            | 8.00 (1.85) | 38.9 |

Abbreviations: SD = standard deviation; PhD = Doctor; EHEA = European Higher Education Area.
